# Supplementary material for: AKT Pathway Genes Define 5 Prognostic Subgroups in Glioblastoma
Source: PLoS One. 2014 Jul 1;9(7):e100827. doi: 10.1371/journal.pone.0100827 (PMC4077731; doi:10.1371/journal.pone.0100827)
Supplement: Table S2 — AKT pathway gene classifiers used for the discovery and validation datasets. (XLSX) [file pone.0100827.s005.xlsx]

## Sheet: Table S2 AKT gene list
discovery Akt pathway gene list		validation Akt pathway gene list
ACLY		ACLY
AKT1		AKT1
AKT1S1		ATXN1
ATXN1		BCL10
BCL10		CCND1
CCND1		CDC37
CDC37		CDKN1A
CDKN1A		CDKN1B
CDKN1B		CFD
CFD		CHEK1
CHEK1		EGFR
EGFR		EIF3B
EIF3B		EIF3E
EIF3E		EIF3G
EIF3G		EIF3H
EIF3H		EIF4EBP1
EIF4EBP1		EPAS1
EPAS1		EZH2
EZH2		FGFR2
FGFR2		FGFR3
FGFR3		FOXO3
FOXO3		FYN
FYN		GAB1
GAB1		GAB2
GAB2		GRB10
GRB10		GSK3B
GSK3B		HIF1A
HIF1A		HSP90AB1
HSP90AB1		HSP90B1
HSP90B1		INPP5D
IGF2		IRS1
INPP5D		IRS2
IRS1		KDR
IRS2		KRAS
KDR		MAP3K5
KRAS		MAPK8IP1
MAP3K5		NRAS
MAPK8IP1		PALLD
NRAS		PDGFA
PALLD		PDGFC
PDGFA		PDGFD
PDGFC		PDGFRB
PDGFD		PDK1
PDGFRB		PHLPP1
PDK1		PIK3C2B
PHLPP		PIK3CA
PIK3C2B		PIK3R1
PIK3CA		PKD2
PIK3R1		PKN2
PKD2		PPARGC1A
PKN2		PPP2R1A
PPARGC1A		PPP2R2B
PPP2R1A		RAF1
PPP2R2B		SORBS2
PPP2R2C		SRSF1
RAF1		SSB
RICTOR		SYK
SFRS1		TP53
SORBS2		TRIB3
SSB		TSC1
SYK		TSC2
TP53		TWIST1
TRIB3		VIM
TSC1		WNK1
TSC2
TWIST1
VIM
WNK1
YBX1
