# Supplementary material for: AKT Pathway Genes Define 5 Prognostic Subgroups in Glioblastoma
Source: PLoS One. 2014 Jul 1;9(7):e100827. doi: 10.1371/journal.pone.0100827 (PMC4077731; doi:10.1371/journal.pone.0100827)
Supplement: Table S6 — Focal DNA amplifications in subgroups. Copy number alterations in subgroups were evaluated using GISTIC and the q score for statistically significant focal DNA copy number gains (q score < 0.25) listed. Focal copy number changes common to all subgroups (q < 0.25 in all subgroups) are not reported. (XLSX) [file pone.0100827.s009.xlsx]

## Sheet: Table S6 focal amplifications
	FOCAL AMPLIFICATIONS
		subgroup						known/candidate glioma gene or gene under peak	chr region
	chromosome		PN	MES	CLAS	SL	PROLIF
		1			9.3738e-05			PRDM2, PDPN	1p36.21
			8.3789e-13	2.0147e-07	2.2013e-14		0.00031312	MDM4, PIK3C2B	1q32.1
					6.3034e-06			olfactory receptor genes	1q44
		2					0.0003951	MYCN	2p24.3
		3				0.045289		PIK3CA	3q26.32
			0.0061425					SOX2	3q26.33
		5	0.041135	8.1539e-10				ZDHHC11	5p15.33
		6				0.079349		ETV7	6p21.32
						0.075391		C6orf89, PPIL1	6p21.2
						0.079349		CCND3	6p21.1
						0.11908		TBCC	6p21.1
		7				7p14.1		TARP	7p14.1
		11	0.23103	0.070876				olfactory receptor genes	11q11
		12					0.0010083	SLC38A4	12q13.13
			0.010052					CCND2	12p13.32
						0.0092016		CACNA1C	12p13.33
				3.9384e-05				FAM19A2	12q14.1
					0.0024169		0.011049	SRGAP1	12q14.2
					4.0779e-06		0.0002129	CAND1	12q14.3
			0.0066733	6.3006e-33	4.9294e-22		2.4718e-14	MDM2	12q15
						0.010762		no gene	12q24.21
						0.075391		GLT1D1	12q24.32
		15	0.010052	0.0017948	0.0009632	0.019323		OR4M2	15q11.2
